# Supplementary material
Source: MDPI journal article supplement (https://www.mdpi.com/2073-4336/1/2/117)
Supplement: s3 [file s3]

Correction

## Erev, I. *et al.* A Choice Prediction Competition for Market Entry Games: An Introduction. *Games* 2010, 1, 117–136

Ido Erev <sup>1,\*</sup>, Eyal Ert <sup>2</sup> and Alvin E. Roth <sup>3,4</sup>

<sup>1</sup> Max Wertheimer Minerva Center for Cognitive Studies, Faculty of Industrial Engineering and Management, Technion, Haifa 32000, Israel

<sup>2</sup> Computer Laboratory for Experimental Research, Harvard Business School, Boston, MA, 02163, USA; E-Mail: eert@hbs.edu

<sup>3</sup> Department of Economics, 308 Littauer, Harvard University, Cambridge, MA 02138, USA; E-Mail: aroth@hbs.edu

<sup>4</sup> Harvard Business School, 441 Baker Library, Boston, MA 02163, USA

\* Author to whom correspondence should be addressed; E-Mail: erev@tx.technion.ac.il.

Received: 13 July 2010 / Accepted: 14 July 2010 / Published: 21 July 2010

Ion Juvina found an error in our manuscript published in *Games* [1]. The error led to overestimation (by about 3%) of the alternation rate presented in Table 2 (in page 120). The correction does not change the main conclusions, but it slightly changes five exhibits. The corrected exhibits are presented below, and in the competition website (<http://sites.google.com/site/gpredcomp>).

### Table 2. The 40 market entry games that were studied in the estimation experiment.

At each trial, each of 4 players has to decide (individually) between “entering a risky market”, or “staying out” (a safer prospect). The payoffs depended on a realization of a binary gamble (the realization at trial  $t$  is denoted  $G_t$ , and yields “H with probability  $P_H$ ; and L otherwise”), the number of entrants ( $E$ ), and two additional parameters ( $k$  and  $S$ ). The exact payoff for player  $i$  at trial  $t$  is:

$$V_i(t) = \begin{cases} 10 - k(E) + G_t & \text{if } i \text{ enters} \\ \text{round}(G_t/S) \text{ with } p = .5; -\text{round}(G_t/S) \text{ otherwise} & \text{if } i \text{ does not enter} \end{cases}$$

The left hand-columns present the exact value of the different parameters in the 40 games, the right hand columns present the equilibrium predictions, and the main experimental results in the first and second block (B1 and B2).

Table 2. Cont.

| The games |   |      |    |     |   | Entry at eq. |           | Experimental results |      |            |       |              |      |
|-----------|---|------|----|-----|---|--------------|-----------|----------------------|------|------------|-------|--------------|------|
| #         | K | ph   | H  | L   | S | pure         | symmetric | Entry rates          |      | Efficiency |       | Alternations |      |
|           |   |      |    |     |   |              |           | B1                   | B2   | B1         | B2    | B1           | B2   |
| 1         | 2 | 0.04 | 70 | -3  | 5 | 1.00         | 1.00      | 0.71                 | 0.80 | 2.77       | 2.66  | 0.16         | 0.16 |
| 2         | 2 | 0.23 | 30 | -9  | 4 | 1.00         | 1.00      | 0.55                 | 0.62 | 2.64       | 2.75  | 0.25         | 0.23 |
| 3         | 2 | 0.67 | 1  | -2  | 3 | 1.00         | 1.00      | 0.88                 | 0.94 | 2.39       | 2.24  | 0.10         | 0.04 |
| 4         | 2 | 0.73 | 30 | -80 | 4 | 1.00         | 1.00      | 0.71                 | 0.64 | 2.58       | 2.57  | 0.28         | 0.27 |
| 5         | 2 | 0.80 | 20 | -80 | 5 | 1.00         | 1.00      | 0.66                 | 0.67 | 2.50       | 2.67  | 0.29         | 0.27 |
| 6         | 2 | 0.83 | 4  | -20 | 3 | 1.00         | 1.00      | 0.73                 | 0.82 | 2.45       | 2.50  | 0.24         | 0.18 |
| 7         | 2 | 0.94 | 6  | -90 | 5 | 1.00         | 1.00      | 0.86                 | 0.87 | 2.34       | 2.38  | 0.13         | 0.11 |
| 8         | 2 | 0.95 | 1  | -20 | 5 | 1.00         | 1.00      | 0.86                 | 0.91 | 2.48       | 2.31  | 0.12         | 0.08 |
| 9         | 2 | 0.96 | 4  | -90 | 3 | 1.00         | 1.00      | 0.87                 | 0.90 | 2.36       | 2.34  | 0.14         | 0.08 |
| 10        | 3 | 0.10 | 70 | -8  | 4 | 0.75         | 0.77      | 0.42                 | 0.48 | 1.22       | 1.11  | 0.29         | 0.25 |
| 11        | 3 | 0.90 | 9  | -80 | 4 | 0.75         | 0.77      | 0.80                 | 0.73 | -0.33      | 0.29  | 0.18         | 0.25 |
| 12        | 3 | 0.91 | 7  | -70 | 6 | 0.75         | 0.77      | 0.76                 | 0.83 | 0.10       | -0.41 | 0.19         | 0.12 |
| 13        | 4 | 0.06 | 60 | -4  | 2 | 0.50         | 0.50      | 0.42                 | 0.41 | 0.52       | 0.84  | 0.22         | 0.15 |
| 14        | 4 | 0.20 | 40 | -10 | 4 | 0.50         | 0.50      | 0.48                 | 0.46 | -0.34      | 0.04  | 0.31         | 0.31 |
| 15        | 4 | 0.31 | 20 | -9  | 4 | 0.50         | 0.50      | 0.49                 | 0.44 | -0.07      | 0.30  | 0.34         | 0.38 |
| 16        | 4 | 0.60 | 4  | -6  | 2 | 0.50         | 0.50      | 0.56                 | 0.58 | -0.27      | -0.26 | 0.22         | 0.26 |
| 17        | 4 | 0.60 | 40 | -60 | 3 | 0.50         | 0.50      | 0.58                 | 0.55 | -0.96      | -0.20 | 0.28         | 0.25 |
| 18        | 4 | 0.73 | 3  | -8  | 2 | 0.50         | 0.50      | 0.57                 | 0.55 | -0.29      | 0.09  | 0.24         | 0.20 |
| 19        | 4 | 0.80 | 20 | -80 | 2 | 0.50         | 0.50      | 0.64                 | 0.63 | -1.30      | -1.21 | 0.28         | 0.27 |
| 20        | 4 | 0.90 | 1  | -9  | 6 | 0.50         | 0.50      | 0.53                 | 0.48 | 0.12       | 0.63  | 0.21         | 0.16 |
| 21        | 4 | 0.96 | 3  | -70 | 3 | 0.50         | 0.50      | 0.65                 | 0.62 | -0.84      | -0.38 | 0.23         | 0.18 |
| 22        | 5 | 0.02 | 80 | -2  | 3 | 0.25         | 0.33      | 0.36                 | 0.31 | 0.24       | 0.64  | 0.17         | 0.17 |
| 23        | 5 | 0.07 | 90 | -7  | 3 | 0.25         | 0.33      | 0.39                 | 0.24 | -0.81      | 0.34  | 0.19         | 0.13 |
| 24        | 5 | 0.53 | 80 | -90 | 5 | 0.25         | 0.33      | 0.65                 | 0.58 | -3.41      | -2.44 | 0.27         | 0.36 |
| 25        | 5 | 0.80 | 1  | -4  | 2 | 0.25         | 0.33      | 0.45                 | 0.42 | -0.31      | 0.11  | 0.20         | 0.18 |
| 26        | 5 | 0.88 | 4  | -30 | 3 | 0.25         | 0.33      | 0.52                 | 0.49 | -0.95      | -0.57 | 0.22         | 0.21 |
| 27        | 5 | 0.93 | 5  | -70 | 4 | 0.25         | 0.33      | 0.57                 | 0.57 | -1.63      | -1.43 | 0.27         | 0.20 |
| 28        | 6 | 0.10 | 90 | -10 | 5 | 0.25         | 0.22      | 0.26                 | 0.27 | -0.13      | 0.07  | 0.22         | 0.19 |
| 29        | 6 | 0.19 | 30 | -7  | 3 | 0.25         | 0.22      | 0.39                 | 0.32 | -1.35      | -0.45 | 0.27         | 0.26 |
| 30        | 6 | 0.29 | 50 | -20 | 3 | 0.25         | 0.22      | 0.47                 | 0.48 | -2.74      | -2.43 | 0.38         | 0.36 |
| 31        | 6 | 0.46 | 7  | -6  | 6 | 0.25         | 0.22      | 0.38                 | 0.34 | -0.90      | -0.38 | 0.23         | 0.24 |
| 32        | 6 | 0.57 | 6  | -8  | 4 | 0.25         | 0.22      | 0.44                 | 0.39 | -1.56      | -0.59 | 0.26         | 0.27 |
| 33        | 6 | 0.82 | 20 | -90 | 3 | 0.25         | 0.22      | 0.63                 | 0.55 | -5.33      | -3.14 | 0.26         | 0.21 |
| 34        | 6 | 0.88 | 8  | -60 | 4 | 0.25         | 0.22      | 0.57                 | 0.50 | -3.30      | -1.96 | 0.16         | 0.19 |
| 35        | 7 | 0.06 | 90 | -6  | 4 | 0.25         | 0.14      | 0.31                 | 0.35 | -1.40      | -1.43 | 0.29         | 0.21 |
| 36        | 7 | 0.21 | 30 | -8  | 3 | 0.25         | 0.14      | 0.39                 | 0.31 | -2.20      | -1.04 | 0.30         | 0.23 |
| 37        | 7 | 0.50 | 80 | -80 | 5 | 0.25         | 0.14      | 0.51                 | 0.55 | -4.18      | -4.78 | 0.34         | 0.32 |
| 38        | 7 | 0.69 | 9  | -20 | 5 | 0.25         | 0.14      | 0.46                 | 0.34 | -2.62      | -0.88 | 0.25         | 0.23 |

Table 2. Cont.

|                          |   |      |   |     |   | Experimental results |           |             |       |            |       |              |       |
|--------------------------|---|------|---|-----|---|----------------------|-----------|-------------|-------|------------|-------|--------------|-------|
| The games                |   |      |   |     |   | Entry at eq.         |           | Entry rates |       | Efficiency |       | Alternations |       |
| #                        | K | ph   | H | L   | S | pure                 | symmetric | B1          | B2    | B1         | B2    | B1           | B2    |
| 39                       | 7 | 0.81 | 7 | -30 | 2 | 0.25                 | 0.14      | 0.41        | 0.34  | -2.25      | -0.93 | 0.22         | 0.21  |
| 40                       | 7 | 0.91 | 1 | -10 | 2 | 0.25                 | 0.14      | 0.34        | 0.27  | -0.71      | -0.30 | 0.19         | 0.17  |
| Means                    |   |      |   |     |   | 0.51                 | 0.51      | 0.56        | 0.54  | -0.39      | 0.04  | 0.23         | 0.21  |
| Estimated error variance |   |      |   |     |   |                      |           | .0016       | .0015 | .1370      | .1188 | .0012        | .0015 |

**Figure 1. Proportion of alternation as a function of Ph.** Each data point summarizes the results of one game. The outlier (alternation rate of 0.07 when Ph = 0.67) is Problem 3: The problem with the lowest payoff variance, and the only problem in which entry cannot lead to losses.

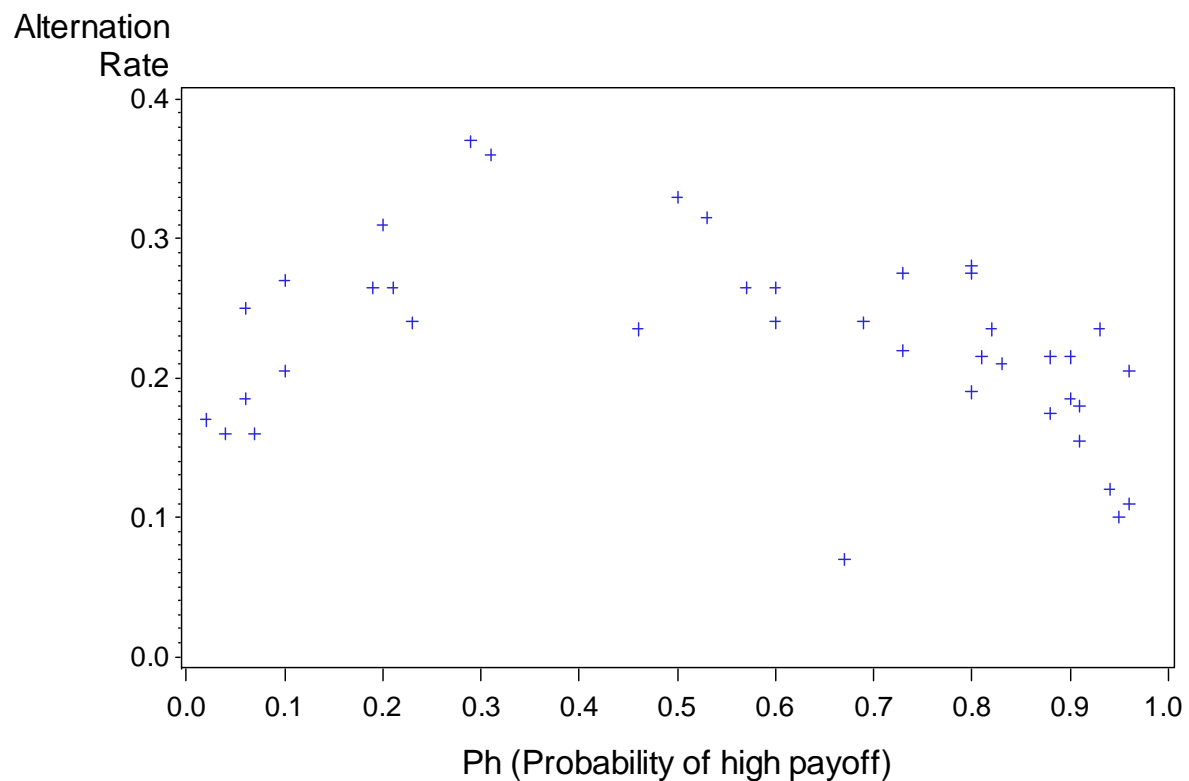

**Table 3. Summary of correlation analyses that examine the possibility of consistent individual differences.** The summary scores are based on 180 correlation analyses (180 pairs of games) for each of the four variables.

| Variable     | Mean correlation | Proportion of positive correlations |
|--------------|------------------|-------------------------------------|
| Entry rate   | 0.249            | 0.844                               |
| Maximization | 0.058            | 0.611                               |
| Alternation  | 0.415            | 0.983                               |
| Recency      | 0.281            | 0.888                               |

**Table 4. The baseline models, the estimated parameters, and the implied normalized MSD scores by statistic and block.**

| Model     | Fitted parameters                                                                                                                            | Normalized Mean Squared Deviation Scores by statistic and block |       |            |       |            |       |       |
|-----------|----------------------------------------------------------------------------------------------------------------------------------------------|-----------------------------------------------------------------|-------|------------|-------|------------|-------|-------|
|           |                                                                                                                                              | Entry rates                                                     |       | Efficiency |       | Alteration |       | Mean  |
|           | Block:                                                                                                                                       | 1                                                               | 2     | 1          | 2     | 1          | 2     |       |
| Pure      |                                                                                                                                              | 26.52                                                           | 21.56 | 39.41      | 28.01 | 49.50      | 35.26 | 33.38 |
| Symmetric |                                                                                                                                              | 29.57                                                           | 25.11 | 21.13      | 13.24 | 30.59      | 25.95 | 24.26 |
| RL        | $\lambda = 4, w = 0.01$                                                                                                                      | 8.57                                                            | 16.37 | 5.19       | 8.84  | 19.14      | 12.22 | 11.72 |
| NRL       | $\lambda = 12, w = 0.025$                                                                                                                    | 6.36                                                            | 14.03 | 3.59       | 7.35  | 4.58       | 1.53  | 6.24  |
| SFP       | $\lambda = 1.5, w = 0.1$                                                                                                                     | 5.91                                                            | 5.36  | 9.37       | 14.99 | 6.53       | 3.79  | 7.66  |
| NFP       | $\lambda = 4, w = 0.15$                                                                                                                      | 4.75                                                            | 4.16  | 3.60       | 6.13  | 2.70       | 3.80  | 4.19  |
| EWA       | $\lambda = 0.7, \phi = 0.8,$<br>$\delta = 0.5, \rho = 0.4$                                                                                   | 10.06                                                           | 8.91  | 4.69       | 9.22  | 4.38       | 2.49  | 6.62  |
| SAW       | $\varepsilon_i \sim U[0,0.02], w_i \sim U[0,1],$<br>$\rho_i \sim U[0,0.02],$<br>and $\mu_i = \{1, 2, \text{ or } 3\}.$                       | 3.93                                                            | 2.49  | 1.87       | 2.04  | 4.18       | 5.37  | 3.31  |
| I-SAW     | $\varepsilon_i \sim U[0,0.24], w_i \sim U[0,0.8],$<br>$\rho_i \sim U[0,0.2], \pi_i \sim U[0,0.6],$<br>and $\mu_i = \{1, 2, \text{ or } 3\}.$ | 1.56                                                            | 1.19  | 1.37       | 1.47  | 1.43       | 1.30  | 1.38  |

**Table 5. The predictions of the best baseline models (I-SAW):** The lowest row presents the correlation with the experimental results by statistic.

| The games |   |      |    |     |    | Entry rates |      | Efficiency |       | Alternations |      |
|-----------|---|------|----|-----|----|-------------|------|------------|-------|--------------|------|
| #         | K | Ph   | h  | l   | Sf | B1          | B2   | B1         | B2    | B1           | B2   |
| 1         | 2 | 0.04 | 70 | -3  | 5  | 0.78        | 0.81 | 2.60       | 2.56  | 0.17         | 0.13 |
| 2         | 2 | 0.23 | 30 | -9  | 4  | 0.58        | 0.62 | 2.39       | 2.62  | 0.24         | 0.22 |
| 3         | 2 | 0.67 | 1  | -2  | 3  | 0.90        | 0.91 | 2.33       | 2.32  | 0.10         | 0.08 |
| 4         | 2 | 0.73 | 30 | -80 | 4  | 0.64        | 0.64 | 2.47       | 2.59  | 0.26         | 0.25 |
| 5         | 2 | 0.80 | 20 | -80 | 5  | 0.67        | 0.67 | 2.47       | 2.61  | 0.24         | 0.23 |
| 6         | 2 | 0.83 | 4  | -20 | 3  | 0.77        | 0.78 | 2.49       | 2.57  | 0.20         | 0.18 |
| 7         | 2 | 0.94 | 6  | -90 | 5  | 0.82        | 0.82 | 2.39       | 2.49  | 0.15         | 0.14 |
| 8         | 2 | 0.95 | 1  | -20 | 5  | 0.84        | 0.85 | 2.42       | 2.47  | 0.13         | 0.11 |
| 9         | 2 | 0.96 | 4  | -90 | 3  | 0.84        | 0.86 | 2.35       | 2.43  | 0.13         | 0.11 |
| 10        | 3 | 0.10 | 70 | -8  | 4  | 0.42        | 0.45 | 0.97       | 1.23  | 0.23         | 0.21 |
| 11        | 3 | 0.90 | 9  | -80 | 4  | 0.74        | 0.75 | -0.06      | 0.11  | 0.19         | 0.18 |
| 12        | 3 | 0.91 | 7  | -70 | 6  | 0.76        | 0.76 | -0.15      | 0.05  | 0.18         | 0.17 |
| 13        | 4 | 0.06 | 60 | -4  | 2  | 0.41        | 0.43 | 0.22       | 0.34  | 0.24         | 0.22 |
| 14        | 4 | 0.20 | 40 | -10 | 4  | 0.43        | 0.44 | -0.04      | 0.25  | 0.27         | 0.25 |
| 15        | 4 | 0.31 | 20 | -9  | 4  | 0.48        | 0.49 | -0.22      | 0.01  | 0.29         | 0.28 |
| 16        | 4 | 0.60 | 4  | -6  | 2  | 0.52        | 0.52 | -0.20      | -0.05 | 0.30         | 0.28 |
| 17        | 4 | 0.60 | 40 | -60 | 3  | 0.55        | 0.55 | -0.78      | -0.47 | 0.29         | 0.28 |
| 18        | 4 | 0.73 | 3  | -8  | 2  | 0.53        | 0.52 | -0.20      | -0.08 | 0.29         | 0.27 |
| 19        | 4 | 0.80 | 20 | -80 | 2  | 0.65        | 0.64 | -1.65      | -1.23 | 0.24         | 0.24 |

Table 5. Cont.

| The games                                 |   |      |    |     |    | Entry rates |       | Efficiency |        | Alternations |       |
|-------------------------------------------|---|------|----|-----|----|-------------|-------|------------|--------|--------------|-------|
| #                                         | K | Ph   | h  | l   | Sf | B1          | B2    | B1         | B2     | B1           | B2    |
| 20                                        | 4 | 0.90 | 1  | -9  | 6  | 0.52        | 0.52  | 0.07       | 0.06   | 0.25         | 0.23  |
| 21                                        | 4 | 0.96 | 3  | -70 | 3  | 0.61        | 0.59  | -0.80      | -0.51  | 0.21         | 0.19  |
| 22                                        | 5 | 0.02 | 80 | -2  | 3  | 0.35        | 0.35  | -0.08      | 0.06   | 0.23         | 0.20  |
| 23                                        | 5 | 0.07 | 90 | -7  | 3  | 0.31        | 0.32  | -0.42      | -0.05  | 0.21         | 0.19  |
| 24                                        | 5 | 0.53 | 80 | -90 | 5  | 0.52        | 0.52  | -2.03      | -1.59  | 0.29         | 0.28  |
| 25                                        | 5 | 0.80 | 1  | -4  | 2  | 0.40        | 0.40  | -0.24      | -0.10  | 0.25         | 0.23  |
| 26                                        | 5 | 0.88 | 4  | -30 | 3  | 0.47        | 0.46  | -0.89      | -0.73  | 0.25         | 0.22  |
| 27                                        | 5 | 0.93 | 5  | -70 | 4  | 0.51        | 0.50  | -1.43      | -1.08  | 0.24         | 0.21  |
| 28                                        | 6 | 0.10 | 90 | -10 | 5  | 0.31        | 0.31  | -1.08      | -0.63  | 0.22         | 0.20  |
| 29                                        | 6 | 0.19 | 30 | -7  | 3  | 0.36        | 0.36  | -1.28      | -0.90  | 0.26         | 0.24  |
| 30                                        | 6 | 0.29 | 50 | -20 | 3  | 0.42        | 0.42  | -2.05      | -1.62  | 0.29         | 0.27  |
| 31                                        | 6 | 0.46 | 7  | -6  | 6  | 0.35        | 0.35  | -0.86      | -0.67  | 0.27         | 0.24  |
| 32                                        | 6 | 0.57 | 6  | -8  | 4  | 0.36        | 0.35  | -0.94      | -0.70  | 0.27         | 0.25  |
| 33                                        | 6 | 0.82 | 20 | -90 | 3  | 0.60        | 0.57  | -4.69      | -3.73  | 0.25         | 0.24  |
| 34                                        | 6 | 0.88 | 8  | -60 | 4  | 0.47        | 0.46  | -2.20      | -1.83  | 0.25         | 0.22  |
| 35                                        | 7 | 0.06 | 90 | -6  | 4  | 0.26        | 0.26  | -1.19      | -0.68  | 0.20         | 0.18  |
| 36                                        | 7 | 0.21 | 30 | -8  | 3  | 0.34        | 0.33  | -1.77      | -1.32  | 0.26         | 0.24  |
| 37                                        | 7 | 0.50 | 80 | -80 | 5  | 0.49        | 0.48  | -4.31      | -3.61  | 0.29         | 0.28  |
| 38                                        | 7 | 0.69 | 9  | -20 | 5  | 0.37        | 0.36  | -1.84      | -1.52  | 0.26         | 0.24  |
| 39                                        | 7 | 0.81 | 7  | -30 | 2  | 0.37        | 0.36  | -1.81      | -1.50  | 0.26         | 0.23  |
| 40                                        | 7 | 0.91 | 1  | -10 | 2  | 0.29        | 0.28  | -0.76      | -0.58  | 0.22         | 0.19  |
| Means                                     |   |      |    |     |    | 0.525       | 0.526 | -0.270     | -0.011 | 0.234        | 0.215 |
| Correlation with the experimental results |   |      |    |     |    | 0.973       | 0.979 | 0.982      | 0.970  | 0.750        | 0.834 |

## References and Notes

1. Erev, I.; Ert, E.; Roth, A.E. A choice prediction competition for market entry games: An introduction. *Games* **2010**, *1*, 117–136.

© 2010 by the authors; licensee MDPI, Basel, Switzerland. This article is an Open Access article distributed under the terms and conditions of the Creative Commons Attribution license (<http://creativecommons.org/licenses/by/3.0/>).
